# Supplementary material for: High throughput discovery of new fouling-resistant surfaces
Source: Royal Society of Chemistry journal article supplement (doi:10.1039/c0jm01266a), 2010-11-08
Supplement: c0jm01266a.pdf [file c0jm01266a.pdf]

## Supporting Information

### HIGH THROUGHPUT DISCOVERY OF NEW FOULING-RESISTANT SURFACES

Mingyan Zhou, Hongwei Liu, Adith Venkiteshwaran, James Kilduff, Daniel G. Anderson, Robert Langer and Georges Belfort

J. Mater. Chem., DOI: 10.1039/c0jm01266a

**Table S1. Name, structure, and formula weight of monomers employed in this study.**

Notes: Monomers were dissolved in DI water unless designated by superscript “a” which indicates that 90% ethanol was used as the solvent. Commercial vinyl monomers were purchased from Sigma-Aldrich (Saint Louis, MO) and were used as-received without further purification.

#### A. Methacrylates having hydrophobic side chains

| #               | Name                                               | Structure                                                                             | FW     |
|-----------------|----------------------------------------------------|---------------------------------------------------------------------------------------|--------|
| 1 <sup>a</sup>  | Methyl methacrylate                                |  | 100.12 |
| 2 <sup>a</sup>  | Ethyl methacrylate                                 |  | 114.14 |
| 3 <sup>a</sup>  | Butyl methacrylate                                 |  | 140.20 |
| 4 <sup>a</sup>  | Isobutyl methacrylate                              |  | 142.20 |
| 5 <sup>a</sup>  | <i>tert</i> -Butyl methacrylate                    |  | 142.20 |
| 6 <sup>a</sup>  | Hexyl methacrylate                                 |  | 170.25 |
| 7 <sup>a</sup>  | 2-Ethylhexyl methacrylate                          |  | 198.30 |
| 9 <sup>a</sup>  | Allyl methacrylate                                 |  | 126.15 |
| 14 <sup>a</sup> | Cyclohexyl methacrylate                            |  | 168.23 |
| 19 <sup>a</sup> | Isobornyl methacrylate                             |  | 222.32 |
| 28 <sup>a</sup> | Ethylene glycol dicyclopentenyl ether methacrylate |  | 262.34 |

## B. Hetero ring group monomers

| #               | Name                                                                                  | Structure                                                                          | FW     |
|-----------------|---------------------------------------------------------------------------------------|------------------------------------------------------------------------------------|--------|
| 16 <sup>a</sup> | Glycidyl methacrylate                                                                 | 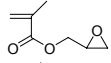 | 142.15 |
| 17 <sup>a</sup> | Tetrahydrofurfuryl methacrylate                                                       |  | 170.21 |
| 39              | 4-Acryloylmorpholine                                                                  |  | 141.17 |
| 40              | ( <i>R</i> )- $\alpha$ -Acryloyloxy- $\beta,\beta$ -dimethyl- $\gamma$ -butyrolactone |  | 184.19 |
| 38 <sup>a</sup> | <i>N</i> -Vinylcaprolactam                                                            |  | 139.19 |

## C. Aromatic monomers

| #               | Name                                      | Structure                                                                            | FW     |
|-----------------|-------------------------------------------|--------------------------------------------------------------------------------------|--------|
| 15 <sup>a</sup> | Phenyl methacrylate                       | 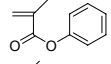 | 162.19 |
| 18 <sup>a</sup> | Benzyl methacrylate                       |  | 176.21 |
| 26 <sup>a</sup> | Ethylene glycol phenyl ether methacrylate |  | 206.24 |
| 37 <sup>a</sup> | Styrene                                   |  | 104.15 |

## D. Hydroxy monomers

| #               | Name                                         | Structure                                                                          | FW     |
|-----------------|----------------------------------------------|------------------------------------------------------------------------------------|--------|
| 24 <sup>a</sup> | Hydroxypropyl methacrylate                   | 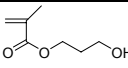 | 144.17 |
| 54              | N-[Tris(hydroxymethyl)methyl]acrylamide      |  | 175.18 |
| 25 <sup>a</sup> | 3-Chloro-2-hydroxypropyl methacrylate        |  | 178.61 |
| 21 <sup>a</sup> | 3-(Trimethoxysilyl)propyl methacrylate       |  | 248.35 |
| 66 <sup>a</sup> | Caprolactone 2-(methacryloyloxy)ethyl ester  |  | 244.28 |
| 64 <sup>a</sup> | Bis[2-(methacryloyloxy)ethyl] phosphate      |  | 322.25 |
| 13 <sup>a</sup> | 3-(Acryloyloxy)-2-hydroxypropyl methacrylate |  | 214.22 |



## F. Strong and weak acid monomers

| #               | Name                                         | Structure | FW     |
|-----------------|----------------------------------------------|-----------|--------|
| 65 <sup>a</sup> | mono-2-(Methacryloyloxy)ethyl maleate        |           | 228.20 |
| 42 <sup>a</sup> | mono-2-(Methacryloyloxy)ethyl succinate      |           | 230.21 |
| 43              | Acrylic acid                                 |           | 72.06  |
| 44              | 2-Acrylamidoglycolic acid                    |           | 163.13 |
| 45              | Methacrylic acid                             |           | 86.09  |
| 50              | Itaconic acid                                |           | 130.10 |
| 46              | 3-Sulfopropyl methacrylate potassium salt    |           | 246.32 |
| 47 <sup>a</sup> | Ethylene glycol methacrylate phosphate       |           | 210.12 |
| 48              | 2-Acrylamido-2-methyl-1-propanesulfonic acid |           | 207.25 |
| 49              | 4-Styrenesulfonic acid sodium salt           |           | 206.19 |

## G. Amine monomers

| #               | Name                                              | Structure | FW     |
|-----------------|---------------------------------------------------|-----------|--------|
| 58              | Acrylamide                                        |           | 71.08  |
| 51              | <i>N</i> -Isopropylacrylamide                     |           | 113.16 |
| 52 <sup>a</sup> | <i>N-tert</i> -Butylacrylamide                    |           | 127.18 |
| 55              | 2-(Dimethylamino)ethyl methacrylate               |           | 157.21 |
| 56 <sup>a</sup> | 2-(Diethylamino)ethyl methacrylate                |           | 185.26 |
| 57              | <i>N</i> -[3-(Dimethylamino)propyl]methacrylamide |           | 170.25 |

## H. Basic and Zwitterionic monomers

| #  | Name                                                                              | Structure | FW     |
|----|-----------------------------------------------------------------------------------|-----------|--------|
| 59 | [3-(Methacryloylamino)propyl]dimethyl(3-sulfopropyl)ammonium hydroxide inner salt |           | 292.39 |
| 60 | [2-(Methacryloyloxy)ethyl]dimethyl-(3-sulfopropyl)ammonium hydroxide              |           | 279.35 |
| 61 | [2-(Methacryloyloxy)ethyl]trimethylammonium chloride                              |           | 207.70 |
| 62 | [3-(Methacryloylamino)propyl]trimethylammonium chloride                           |           | 220.74 |
| 63 | [2-(Methacryloyloxy)ethyl]trimethylammonium methyl sulfate                        |           | 283.34 |

## I. Other monomers

| #               | Name                                                                           | Structure | FW     |
|-----------------|--------------------------------------------------------------------------------|-----------|--------|
| 41              | Methacrylonitrile                                                              |           | 67.09  |
| 36              | N-Vinylformamide                                                               |           | 71.08  |
| 10 <sup>a</sup> | 2,2,2-Trifluoroethyl methacrylate                                              |           | 168.11 |
| 20 <sup>a</sup> | Trimethylsilyl methacrylate                                                    |           | 158.27 |
| 22 <sup>a</sup> | 2-Isocyanatoethyl methacrylate                                                 |           | 155.15 |
| 11 <sup>a</sup> | 2-(Methacryloyloxy)ethyl acetoacetate<br>Or (2-Acetoacetoxyethyl methacrylate) |           | 214.22 |
| 53              | Diacetone acrylamide                                                           |           | 169.22 |
